# Supplementary figures and images for: uPAR regulates bronchial epithelial repair in vitro and is elevated in asthmatic epithelium
Source: PubMed Central journal article supplement — Thorax. 2011 Dec 3;67(6):477–87. doi: 10.1136/thoraxjnl-2011-200508 (PMC3358731; doi:10.1136/thoraxjnl-2011-200508), 2011-12-03

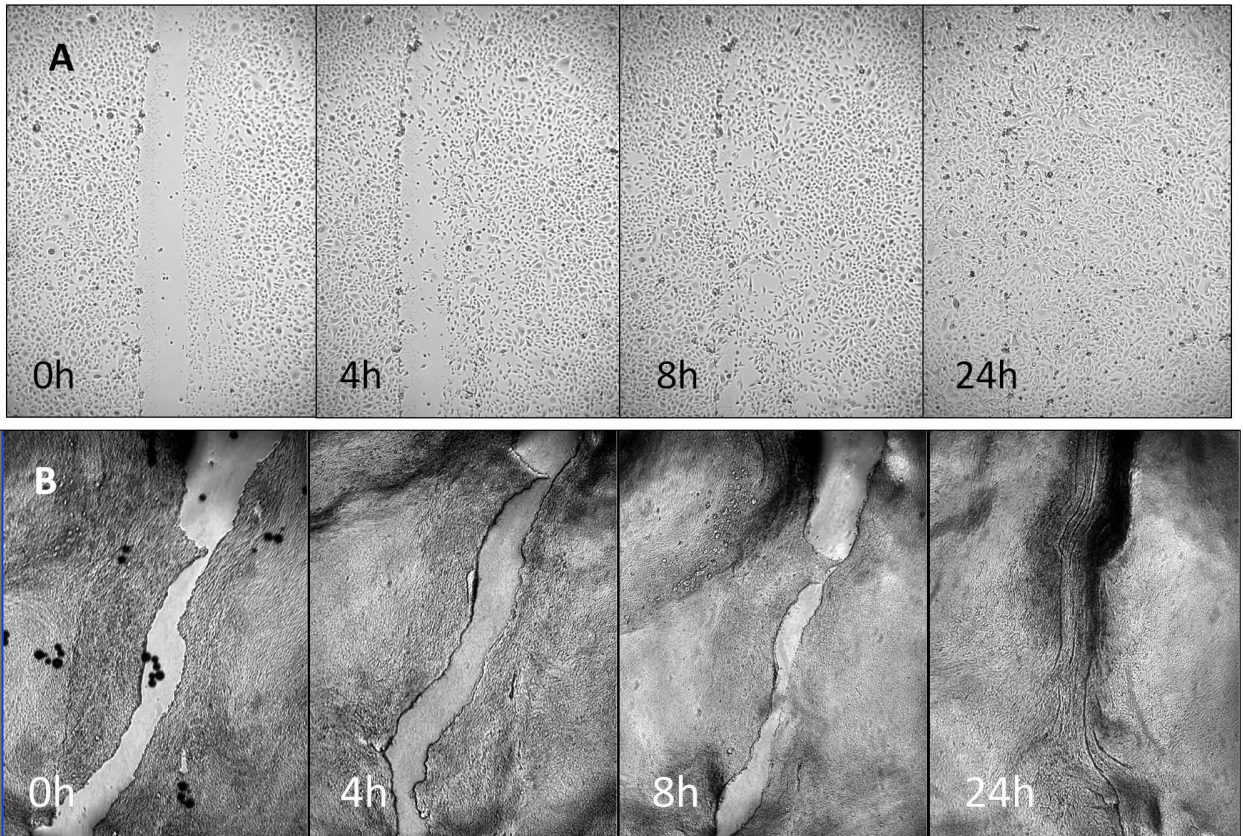

**FigE1**

Supplement: thoraxjnl-2011-200508-s1.pdf [file thoraxjnl-2011-200508-s1.pdf]

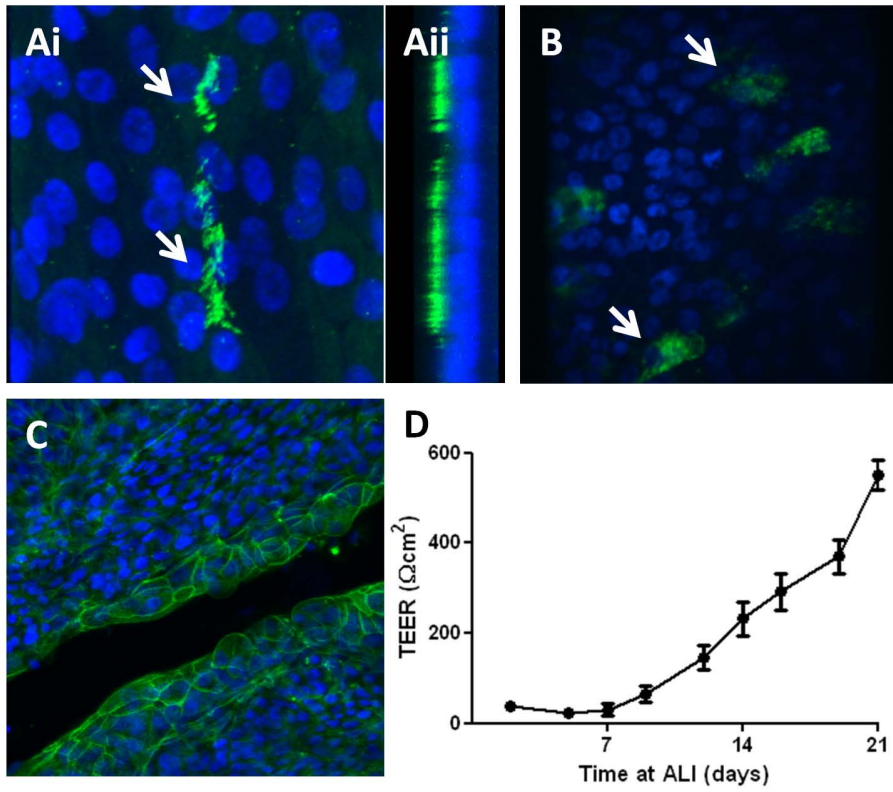

FigE2

Supplement: thoraxjnl-2011-200508-s2.pdf [file thoraxjnl-2011-200508-s2.pdf]

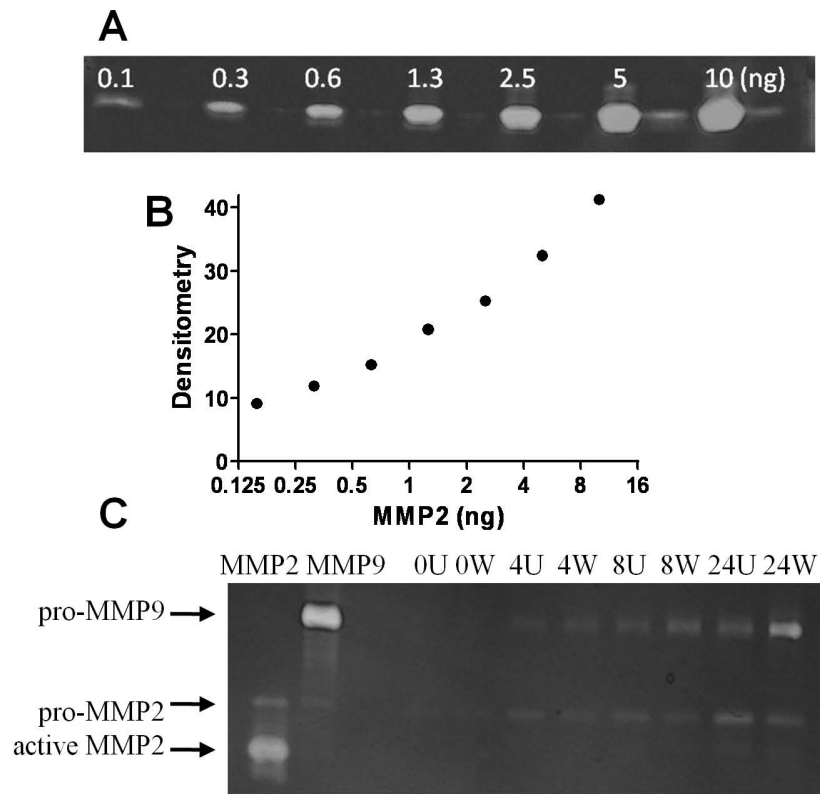

Fig E3

Supplement: thoraxjnl-2011-200508-s3.pdf [file thoraxjnl-2011-200508-s3.pdf]
